# Supplementary material for: The Majority of Typhoid Toxin-Positive Salmonella Serovars Encode ArtB, an Alternate Binding Subunit
Source: PubMed Central journal article supplement (PMC7845599; doi:10.1128/msphere.01255-20), 2021-01-06

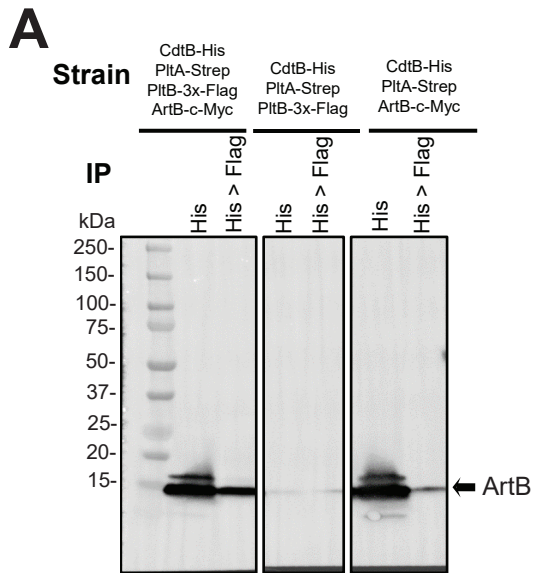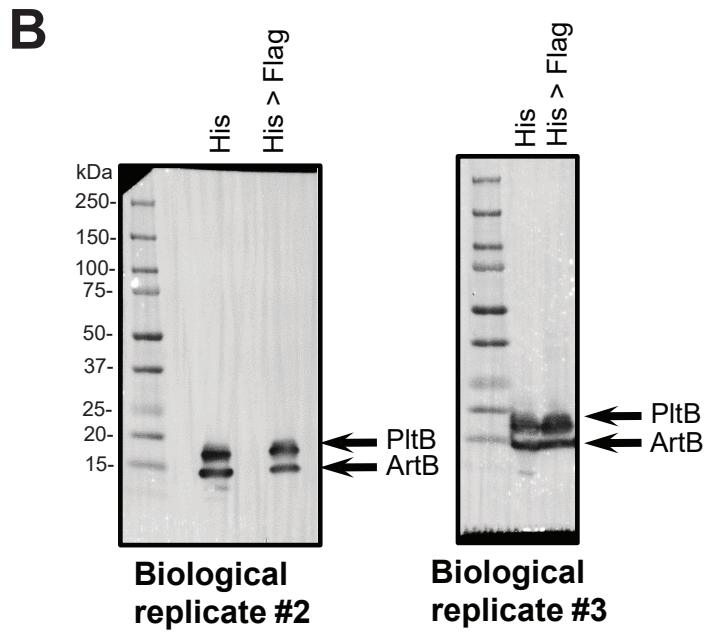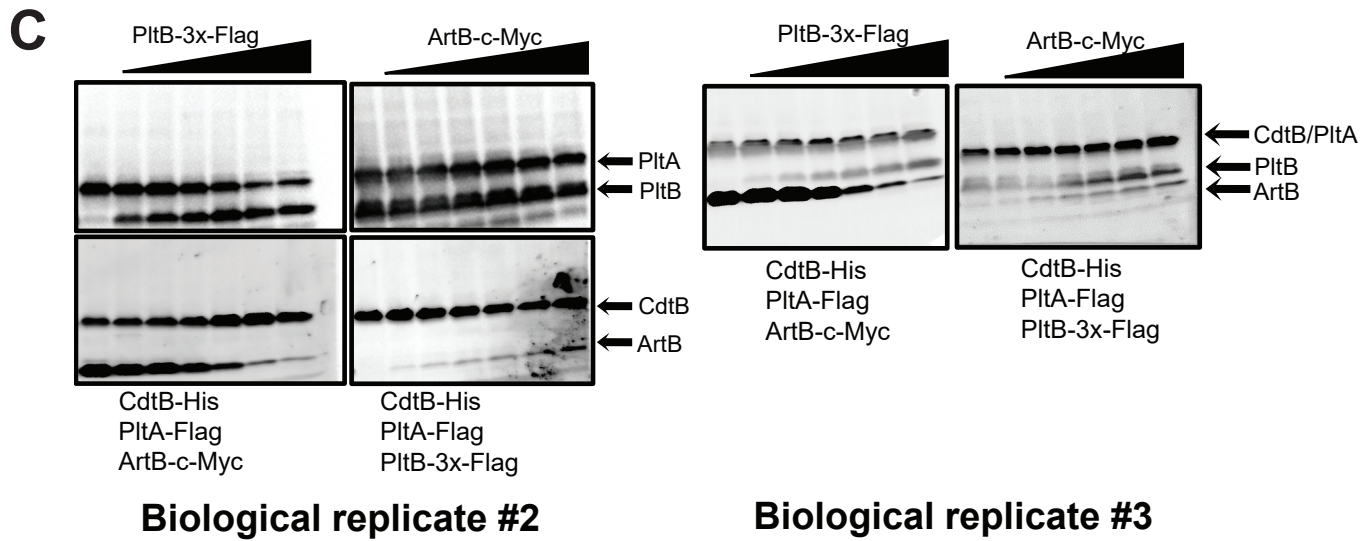

Supplement: mSphere.01255-20-sf002.pdf [file mSphere.01255-20-sf002.pdf]
