# Supplementary material for: The Majority of Typhoid Toxin-Positive Salmonella Serovars Encode ArtB, an Alternate Binding Subunit
Source: PubMed Central journal article supplement (PMC7845599; doi:10.1128/msphere.01255-20), 2021-01-06
Supplement: mSphere.01255-20-st001.pdf [file mSphere.01255-20-st001.pdf]

| Subspecies        | subsp.<br><i>enterica</i><br>clade <sup>a</sup> | Serovar                                    | Assembly      | <i>pltA</i> length<br>(% identity with<br><i>S. Javiana pltA</i> ) <sup>b</sup> | <i>pltB</i> length<br>(% identity with<br><i>S. Javiana pltB</i> ) <sup>c</sup> |
|-------------------|-------------------------------------------------|--------------------------------------------|---------------|---------------------------------------------------------------------------------|---------------------------------------------------------------------------------|
| <i>arizonae</i>   | -                                               | IIIa 41:Z <sub>4</sub> ,Z <sub>23</sub> :- | GCA_000018625 | 732 nt. (81%)                                                                   | 456 nt. (67%)                                                                   |
| <i>diarizonae</i> | -                                               | IIIb 50:r:z                                | GCF_002107575 | 732 nt. (82%)                                                                   | 453 nt. (68%)                                                                   |
| <i>enterica</i>   | A2                                              | Inverness                                  | GCA_000487155 | 732 nt. (81%)                                                                   | 426 nt. (65%)                                                                   |
| <i>enterica</i>   | B                                               | Tanger                                     | GCA_007009285 | 738 nt. (79%)                                                                   | 423 nt. (67%)                                                                   |
| <i>enterica</i>   | D                                               | Brazzaville                                | GCA_007644865 | 735 nt. (79%)                                                                   | 414 nt. (66%)                                                                   |
| <i>enterica</i>   | D                                               | Kalina                                     | GCA_007414785 | 735 nt. (79%)                                                                   | 414 nt. (66%)                                                                   |
| <i>enterica</i>   | D                                               | Westminster                                | GCA_009249885 | 735 nt. (79%)                                                                   | 414 nt. (66%)                                                                   |
| <i>enterica</i>   | Section Typhi                                   | Mississippi                                | GCA_008588385 | 732 nt. (82%)                                                                   | 414 nt. (67%)                                                                   |

<sup>a</sup>clade assigned based on phylogenetic assessment from core SNP analysis.

<sup>b</sup>comparison of *pltA* in given genome with *pltA* from *S. Javiana* CFSAN001992, which has a nucleotide length of 729 nt.; Inverness GCA\_000487155 encodes two different TT islets that share 100% identity with each other, therefore the results presented here are representative of both loci.

<sup>c</sup>comparison of *pltB* in given genome with *pltB* from *S. Javiana* CFSAN001992, which has a nucleotide length of 414 nt.; Inverness GCA\_000487155 encodes two different TT islets that share 100% identity with each other, therefore the results presented here are representative of both loci.
