# Supplementary material for: The Majority of Typhoid Toxin-Positive Salmonella Serovars Encode ArtB, an Alternate Binding Subunit
Source: PubMed Central journal article supplement (PMC7845599; doi:10.1128/msphere.01255-20), 2021-01-06
Supplement: mSphere.01255-20-st002.pdf [file mSphere.01255-20-st002.pdf]

| Clade <sup>a</sup> | Serovar     | Strain        | Assembly  | Approx. <i>artB</i> islet location | Number of ORFs <sup>b</sup> | <i>artB</i> islet % GC <sup>c</sup> | Genome % GC |
|--------------------|-------------|---------------|-----------|------------------------------------|-----------------------------|-------------------------------------|-------------|
| A1                 | Goldcoast   | R18.0877      | CP037960  | 2.16 – 2.17 Mb                     | 5                           | 41.7%                               | 52.3%       |
| A2                 | Milwaukee   | SA19950795    | CP030175  | 2.47 – 2.48 Mb                     | 4                           | 44.7%                               | 52.2%       |
| B                  | Javiana     | CFSAN001992   | CP004027  | 0.56 – 0.57 Mb                     | 5                           | 41.6%                               | 52.2%       |
| B                  | Poona       | ATCC BAA-1673 | CP019189  | 2.17 – 2.18 Mb                     | 5                           | 41.2%                               | 52.2%       |
| Typhi              | Indiana     | SI102         | CP050771  | 2.24 – 2.25 Mb                     | 5                           | 41.9%                               | 52.1%       |
| Typhi              | Paratyphi A | AKU_12601     | AFM200053 | 1.24 – 1.25 Mb                     | 5                           | 41.9%                               | 52.2%       |
| Typhi              | Typhi       | CT18          | AL513382  | 1.31 – 1.32 Mb                     | 7                           | 42.6%                               | 52.1%       |

<sup>a</sup>Clade assigned based on phylogenetic assessment from core SNP analysis.

<sup>b</sup>The number of open reading frames (ORFs) assigned by NCBI annotation that were at least 100 nucleotides in length.

<sup>c</sup>*artB* islet includes all nucleotides between *sapB* and *sapC*.
