# Supplementary material for: The Majority of Typhoid Toxin-Positive Salmonella Serovars Encode ArtB, an Alternate Binding Subunit
Source: PubMed Central journal article supplement (PMC7845599; doi:10.1128/msphere.01255-20), 2021-01-06
Supplement: mSphere.01255-20-st003.pdf [file mSphere.01255-20-st003.pdf]

| <b>Serovar<sup>a</sup></b> | <b>Run #<sup>b</sup></b> | <b>Source</b>               | <b>Country<sup>c</sup></b> | <b>SNP Cluster<sup>d</sup></b> | <b>Reason for Inclusion</b> |
|----------------------------|--------------------------|-----------------------------|----------------------------|--------------------------------|-----------------------------|
| Javiana                    | SRR11604455              | Human clinical              | USA                        | Not listed                     | Used for experiments        |
| Javiana                    | SRR7081896               | Human clinical (stool)      | USA                        | Not listed                     | Clinical source             |
| Javiana                    | SRR7063447               | Human clinical (blood)      | USA                        | PDS000026970                   | Clinical source             |
| Javiana                    | SRR7063441               | Human clinical (stool)      | USA                        | PDS000026970                   | Clinical source             |
| Javiana                    | SRR7063436               | Human clinical (stool)      | USA                        | PDS000026970                   | Clinical source             |
| Javiana                    | SRR5816109               | Animal (swine)              | USA                        | PDS000026915                   | Unique source               |
| Javiana                    | SRR6311987               | Animal (canine)             | USA                        | PDS000036032                   | Unique source               |
| Javiana                    | SRR5598907               | Environmental (frog legs)   | USA                        | PDS000027056                   | Unique source               |
| Javiana                    | SRR2585797               | Environmental (toad)        | Mexico                     | PDS000027026                   | Unique source               |
| Javiana                    | SRR2968972               | Environmental (creek water) | USA                        | PDS000026970                   | Unique source               |
| Javiana                    | SRR4124058               | Human clinical (stool)      | USA                        | Not listed                     | Clinical source             |
| Javiana                    | SRR6480222               | Human clinical (stool)      | USA                        | PDS000002099                   | Clinical source             |
| Javiana                    | SRR6396486               | Human clinical (stool)      | USA                        | PDS000026970                   | Clinical source             |
| Javiana                    | SRR6321401               | Human clinical (stool)      | USA                        | PDS000002101                   | Unique SNP cluster          |
| Javiana                    | SRR5724832               | Human clinical (stool)      | USA                        | PDS000002099                   | Clinical source             |
| Javiana                    | SRR5676348               | Human clinical (stool)      | USA                        | PDS000026970                   | Clinical source             |
| Javiana                    | SRR5605812               | Human clinical (urine)      | USA                        | PDS000026970                   | Clinical source             |
| Javiana                    | SRR1509381               | Human clinical (stool)      | USA                        | PDS000031655                   | Unique SNP cluster          |
| Javiana                    | SRR1561167               | Food (lobster)              | Indonesia                  | Not listed                     | Unique location             |
| Javiana                    | SRR1962283               | Human clinical              | UK                         | Not listed                     | Clinical source             |
| Javiana                    | SRR1965602               | Human clinical              | UK                         | PDS000031042                   | Unique SNP cluster          |
| Javiana                    | SRR3092111               | Food (peppers)              | Mexico                     | Not listed                     | Unique source               |
| Javiana                    | SRR3137186               | Human clinical (stool)      | USA                        | PDS000026970                   | Clinical source             |
| Javiana                    | SRR5152112               | Human clinical (stool)      | USA                        | PDS000030196                   | Unique SNP cluster          |
| Javiana                    | SRR5160225               | Human clinical (stool)      | USA                        | PDS000027927                   | Unique SNP cluster          |
| Javiana                    | SRR5289505               | Food (candy)                | Pakistan                   | PDS000001767                   | Unique location             |
| Javiana                    | SRR5429767               | Human clinical (stool)      | USA                        | PDS000002100                   | Unique SNP cluster          |
| Javiana                    | SRR5508324               | Human clinical (stool)      | USA                        | PDS000002089                   | Unique SNP cluster          |
| Javiana                    | SRR5583207               | Human clinical              | UK                         | PDS000028979                   | Unique SNP cluster          |
| Javiana                    | SRR5725238               | Human clinical (stool)      | USA                        | PDS000026937                   | Unique SNP cluster          |
| Javiana                    | SRR7346572               | Human clinical (stool)      | USA                        | PDS000026970                   | Unique SNP cluster          |
| Javiana                    | SRR6791758               | Human clinical (stool)      | USA                        | PDS000027037                   | Unique SNP cluster          |
| Javiana                    | SRR5217754               | Human clinical (stool)      | USA                        | PDS000026970                   | Clinical source             |
| Javiana                    | SRR5217761               | Human clinical (stool)      | USA                        | PDS000026982                   | Unique SNP cluster          |
| Javiana                    | SRR6425474               | Human clinical (stool)      | USA                        | PDS000027004                   | Unique SNP cluster          |
| Javiana                    | SRR5209739               | Human clinical (blood)      | USA                        | PDS000026915                   | Unique SNP cluster          |
| Javiana                    | SRR5023225               | Human clinical (stool)      | USA                        | PDS000026926                   | Unique SNP cluster          |
| Javiana                    | SRR6760627               | Human clinical (stool)      | USA                        | PDS000026948                   | Unique SNP cluster          |
| Javiana                    | SRR2601212               | Human clinical (stool)      | USA                        | PDS000027935                   | Unique SNP cluster          |
| Javiana                    | SRR1754882               | Human clinical (stool)      | USA                        | PDS000031372                   | Unique SNP cluster          |
| Javiana                    | SRR8082595               | Food (kratom)               | USA                        | PDS000027723                   | Unique source               |
| Mississippi                | SRR1960042               | Human clinical              | UK                         | PDS000006090                   | Outgroup                    |

<sup>a</sup>Serovar confirmed with SISTR

<sup>b</sup>SRR run ID assigned by NCBI

<sup>c</sup>Country of origin

<sup>d</sup>SNP cluster assigned by NCBI's Pathogen Browser website
