# Supplementary material for: The Majority of Typhoid Toxin-Positive Salmonella Serovars Encode ArtB, an Alternate Binding Subunit
Source: PubMed Central journal article supplement (PMC7845599; doi:10.1128/msphere.01255-20), 2021-01-06
Supplement: mSphere.01255-20-st004.pdf [file mSphere.01255-20-st004.pdf]

| Plasmid combinations <sup>a</sup>               | Estimate  | Standard Error | t value | p value  | p value adjust <sup>b</sup> |
|-------------------------------------------------|-----------|----------------|---------|----------|-----------------------------|
| ArtB <sub>T25N</sub> + ctPltB <sub>T18C</sub>   | -0.030360 | 0.043426       | -0.699  | 0.48897  | 0.9995                      |
| ArtB <sub>T25N</sub> + PltB <sub>T18C</sub>     | -0.003575 | 0.043426       | -0.082  | 0.93485  | 1.0000                      |
| ArtB <sub>T18</sub> + ArtB <sub>T25</sub>       | 0.317006  | 0.043426       | 7.300   | 1.33e-08 | <0.001                      |
| ArtB <sub>T18</sub> + ctPltB <sub>T25</sub>     | 0.011286  | 0.043426       | 0.260   | 0.79643  | 1.0000                      |
| ArtB <sub>T18C</sub> + ctPltB <sub>T25</sub>    | -0.011878 | 0.043426       | -0.274  | 0.78602  | 1.0000                      |
| ArtB <sub>T18C</sub> + PltB <sub>T25</sub>      | -0.022905 | 0.043426       | -0.527  | 0.60112  | 1.0000                      |
| ctArtB <sub>T25</sub> + PltB <sub>T18C</sub>    | 0.014355  | 0.043426       | 0.331   | 0.74289  | 1.0000                      |
| ctArtB <sub>T25</sub> + PltB <sub>T18</sub>     | 0.112489  | 0.043426       | 2.590   | 0.01376  | 0.1353                      |
| ctArtB <sub>T18</sub> + PltB <sub>T25</sub>     | 0.004132  | 0.043426       | 0.095   | 0.92472  | 1.0000                      |
| ctArtB <sub>T18C</sub> + ArtB <sub>NT25</sub>   | 0.060729  | 0.043426       | 1.398   | 0.17054  | 0.8166                      |
| ctArtB <sub>T18C</sub> + ctPltB <sub>NT25</sub> | -0.038878 | 0.043426       | -0.895  | 0.37659  | 0.9924                      |
| ctArtB <sub>T18C</sub> + PltB <sub>NT25</sub>   | 0.037090  | 0.043426       | 0.854   | 0.39870  | 0.9952                      |
| ctPltB <sub>T18</sub> + ctArtB <sub>T25</sub>   | 0.038253  | 0.043426       | 0.881   | 0.38423  | 0.9935                      |
| ctPltB <sub>T18</sub> + ctPltB <sub>T25</sub>   | 1.155483  | 0.043426       | 26.608  | <2e-16   | <0.001                      |
| PltB <sub>T25</sub> + ArtB <sub>T18</sub>       | 0.119244  | 0.043426       | 2.746   | 0.00936  | 0.0973                      |
| PltB <sub>T25</sub> + ctArtB <sub>T18</sub>     | -0.027102 | 0.043426       | -0.624  | 0.53651  | 0.9999                      |
| PltB <sub>T18</sub> + PltB <sub>T25</sub>       | 1.274816  | 0.043426       | 29.356  | <2e-16   | <0.001                      |
| Positive control                                | 1.333219  | 0.043426       | 30.701  | <2e-16   | <0.001                      |

<sup>a</sup>subunits are abbreviated as T25 and T18 for the CyaA fusion where “T25” indicates C-terminus fusion, “T25N” N-terminus fusion, “T18” N-terminus fusion and “T18C” C-terminus fusion to the subunit; “ct” reflects that only the C-terminus of the subunit was included in the construct.

<sup>b</sup>p-value after multiple comparison adjustment with Dunnett contrast.
