# Supplementary material for: The Majority of Typhoid Toxin-Positive Salmonella Serovars Encode ArtB, an Alternate Binding Subunit
Source: PubMed Central journal article supplement (PMC7845599; doi:10.1128/msphere.01255-20), 2021-01-06
Supplement: mSphere.01255-20-st005.pdf [file mSphere.01255-20-st005.pdf]

| <b>Strain</b>   | <b>Relevant genotype/markers</b>                                                                                                                                                                                                                                                                                                                                     | <b>Source</b>              |
|-----------------|----------------------------------------------------------------------------------------------------------------------------------------------------------------------------------------------------------------------------------------------------------------------------------------------------------------------------------------------------------------------|----------------------------|
| BTH101<br>NEB5α | F <sup>-</sup> , <i>cya-99</i> , <i>araD139</i> , <i>galE15</i> , <i>galK16</i> , <i>rpsL1</i> ( <i>Str<sup>r</sup></i> ), <i>hsdR2</i> , <i>mcrA1</i> , <i>mcrB1</i><br><i>fhuA2</i> Δ( <i>argF-lacZ</i> ) <i>U169</i> <i>phoA</i> <i>glnV44</i> Φ80 Δ( <i>lacZ</i> ) <i>M15</i> <i>gyrA96</i> <i>recA1</i> <i>relA1</i> <i>endA1</i><br><i>thi-1</i> <i>hsdR17</i> | (1)<br>New England Biolabs |
| FSL G4-0003     | BTH101 containing pKT25 and pUT18C                                                                                                                                                                                                                                                                                                                                   | This study                 |
| FSL G4-0004     | BTH101 containing pKT25-zip and pUT18C-zip                                                                                                                                                                                                                                                                                                                           | This study                 |
| FSL G4-0005     | BTH101 containing pAG37 and pAG40                                                                                                                                                                                                                                                                                                                                    | This study                 |
| FSL G4-0006     | BTH101 containing pAG37 and pAG43                                                                                                                                                                                                                                                                                                                                    | This study                 |
| FSL G4-0007     | BTH101 containing pAG40                                                                                                                                                                                                                                                                                                                                              | This study                 |
| FSL G4-0008     | BTH101 containing pAG38                                                                                                                                                                                                                                                                                                                                              | This study                 |
| FSL G4-0009     | BTH101 containing pAG39                                                                                                                                                                                                                                                                                                                                              | This study                 |
| FSL G4-0010     | BTH101 containing pAG41                                                                                                                                                                                                                                                                                                                                              | This study                 |
| FSL G4-0011     | BTH101 containing pAG42                                                                                                                                                                                                                                                                                                                                              | This study                 |
| FSL G4-0014     | BTH101 containing pAG23 and pAG25                                                                                                                                                                                                                                                                                                                                    | This study                 |
| FSL G4-0015     | BTH101 containing pAG19 and pAG21                                                                                                                                                                                                                                                                                                                                    | This study                 |
| FSL G4-0016     | BTH101 containing pAG29 and pAG31                                                                                                                                                                                                                                                                                                                                    | This study                 |
| FSL G4-0017     | BTH101 containing pAG34 and pAG36                                                                                                                                                                                                                                                                                                                                    | This study                 |
| FSL G4-0018     | BTH101 containing pAG25 and pAG29                                                                                                                                                                                                                                                                                                                                    | This study                 |
| FSL G4-0019     | BTH101 containing pAG25 and pAG33                                                                                                                                                                                                                                                                                                                                    | This study                 |
| FSL G4-0020     | BTH101 containing pAG19 and pAG31                                                                                                                                                                                                                                                                                                                                    | This study                 |
| FSL G4-0021     | BTH101 containing pAG19 and pAG35                                                                                                                                                                                                                                                                                                                                    | This study                 |
| FSL G4-0022     | BTH101 containing pAG21 and pAG33                                                                                                                                                                                                                                                                                                                                    | This study                 |
| FSL G4-0023     | BTH101 containing pAG21 and pAG29                                                                                                                                                                                                                                                                                                                                    | This study                 |
| FSL G4-0024     | BTH101 containing pAG23 and pAG31                                                                                                                                                                                                                                                                                                                                    | This study                 |
| FSL G4-0025     | BTH101 containing pAG19 and pAG35                                                                                                                                                                                                                                                                                                                                    | This study                 |
| FSL G4-0026     | BTH101 containing pAG24 and pAG36                                                                                                                                                                                                                                                                                                                                    | This study                 |
| FSL G4-0027     | BTH101 containing pAG20 and pAG36                                                                                                                                                                                                                                                                                                                                    | This study                 |
| FSL G4-0028     | BTH101 containing pAG25 and pAG34                                                                                                                                                                                                                                                                                                                                    | This study                 |
| FSL G4-0029     | BTH101 containing pAG22 and pAG34                                                                                                                                                                                                                                                                                                                                    | This study                 |
| FSL G4-0030     | BTH101 containing pAG24 and pAG32                                                                                                                                                                                                                                                                                                                                    | This study                 |
| FSL G4-0031     | BTH101 containing pAG26 and pAG32                                                                                                                                                                                                                                                                                                                                    | This study                 |
| FSL G4-0032     | BTH101 containing pAG26 and pAG30                                                                                                                                                                                                                                                                                                                                    | This study                 |
| FSL G4-0033     | BTH101 containing pAG22 and pAG30                                                                                                                                                                                                                                                                                                                                    | This study                 |
| FSL G4-0034     | BTH101 containing pAG5 and pAG9                                                                                                                                                                                                                                                                                                                                      | This study                 |
| FSL G4-0035     | BTH101 containing pAG40 and pAG38                                                                                                                                                                                                                                                                                                                                    | This study                 |
| FSL G4-0036     | BTH101 containing pAG40 and pAG39                                                                                                                                                                                                                                                                                                                                    | This study                 |

FSL S5-0395 S. Javiana wild-type  
FSL H9-0054 S. Javiana  $\Delta$ *cyaA*

(2)  
This study

---

## References

1. Karimova G, Ullmann A, Ladant D. 2001. Protein-protein interaction between *Bacillus stearothermophilus* tyrosyl-tRNA synthetase subdomains revealed by a bacterial two-hybrid system. *J Mol Microbiol Biotechnol* 3:73-82.
2. Miller RA, Wiedmann M. 2016. The cytolethal distending toxin produced by nontyphoidal *Salmonella* serotypes Javiana, Montevideo, Oranienburg, and Mississippi induces DNA damage in a manner similar to that of serotype Typhi. *MBio* 7.
