# Supplementary material for: The Majority of Typhoid Toxin-Positive Salmonella Serovars Encode ArtB, an Alternate Binding Subunit
Source: PubMed Central journal article supplement (PMC7845599; doi:10.1128/msphere.01255-20), 2021-01-06
Supplement: mSphere.01255-20-st006.pdf [file mSphere.01255-20-st006.pdf]

| Plasmid            | Relevant genotype/markers                                                                                                  | Source     |
|--------------------|----------------------------------------------------------------------------------------------------------------------------|------------|
| pKT25              | Kan <sup>R</sup> , C-terminus fusion of adenylate cyclase T25 domain                                                       | (1, 2)     |
| pKNT25             | Kan <sup>R</sup> , N-terminus fusion of adenylate cyclase T25 domain                                                       | (1, 2)     |
| pUT18C             | Amp <sup>R</sup> , C-terminus fusion of adenylate cyclase T18 domain                                                       | (1, 2)     |
| pUT18              | Amp <sup>R</sup> , N-terminus fusion of adenylate cyclase T18 domain                                                       | (1, 2)     |
| pKT25- <i>zip</i>  | Kan <sup>R</sup> , positive control for adenylate cyclase two-hybrid system                                                | (1, 2)     |
| pUT18C- <i>zip</i> | Amp <sup>R</sup> , positive control for adenylate cyclase two-hybrid system                                                | (1, 2)     |
| pAG1               | pKNT25 containing full-length <i>cdtB</i> fused to adenylate cyclase T25 domain, Kan <sup>R</sup>                          | This study |
| pAG2               | pUT18 containing full-length <i>cdtB</i> fused to adenylate cyclase T18 domain, Amp <sup>R</sup>                           | This study |
| pAG3               | pKT25 containing <i>cdtB</i> lacking signal peptide coding region fused to adenylate cyclase T25 domain, Kan <sup>R</sup>  | This study |
| pAG4               | pKNT25 containing <i>cdtB</i> lacking signal peptide coding region fused to adenylate cyclase T25 domain, Kan <sup>R</sup> | This study |
| pAG5               | pUT18 containing <i>cdtB</i> lacking signal peptide coding region fused to adenylate cyclase T18 domain, Amp <sup>R</sup>  | This study |
| pAG6               | pUT18C containing <i>cdtB</i> lacking signal peptide coding region fused to adenylate cyclase T18 domain, Amp <sup>R</sup> | This study |
| pAG7               | pKNT25 containing full-length <i>pltA</i> fused to adenylate cyclase T25 domain, Kan <sup>R</sup>                          | This study |
| pAG8               | pUT18 containing full-length <i>pltA</i> fused to adenylate cyclase T18 domain, Amp <sup>R</sup>                           | This study |
| pAG9               | pKT25 containing <i>pltA</i> lacking signal peptide coding region fused to adenylate cyclase T25 domain, Kan <sup>R</sup>  | This study |
| pAG10              | pKNT25 containing <i>pltA</i> lacking signal peptide coding region fused to adenylate cyclase T25 domain, Kan <sup>R</sup> | This study |
| pAG11              | pUT18 containing <i>pltA</i> lacking signal peptide coding region fused to adenylate cyclase T18 domain, Amp <sup>R</sup>  | This study |
| pAG12              | pUT18C containing <i>pltA</i> lacking signal peptide coding region fused to adenylate cyclase T18 domain, Amp <sup>R</sup> | This study |
| pAG13              | pKT25 containing c-terminus region of <i>pltA</i> fused to adenylate cyclase T25 domain, Kan <sup>R</sup>                  | This study |
| pAG14              | pKNT25 containing c-terminus region of <i>pltA</i> fused to adenylate cyclase T25 domain, Kan <sup>R</sup>                 | This study |
| pAG15              | pUT18 containing c-terminus region of <i>pltA</i> fused to adenylate cyclase T18 domain, Amp <sup>R</sup>                  | This study |
| pAG16              | pUT18C containing c-terminus region of <i>pltA</i> fused to adenylate cyclase T18 domain, Amp <sup>R</sup>                 | This study |
| pAG17              | pKNT25 containing full-length <i>pltB</i> fused to adenylate cyclase T25 domain, Kan <sup>R</sup>                          | This study |
| pAG18              | pUT18 containing full-length <i>pltB</i> fused to adenylate cyclase T18 domain, Amp <sup>R</sup>                           | This study |
| pAG19              | pKT25 containing <i>pltB</i> lacking signal peptide coding region fused to adenylate cyclase T25 domain, Kan <sup>R</sup>  | This study |
| pAG20              | pKNT25 containing <i>pltB</i> lacking signal peptide coding region fused to adenylate cyclase T25 domain, Kan <sup>R</sup> | This study |
| pAG21              | pUT18 containing <i>pltB</i> lacking signal peptide coding region fused to adenylate cyclase T18 domain, Amp <sup>R</sup>  | This study |
| pAG22              | pUT18C containing <i>pltB</i> lacking signal peptide coding region fused to adenylate cyclase T18 domain, Amp <sup>R</sup> | This study |
| pAG23              | pKT25 containing c-terminus region of <i>pltB</i> fused to adenylate cyclase T25 domain, Kan <sup>R</sup>                  | This study |
| pAG24              | pKNT25 containing c-terminus region of <i>pltB</i> fused to adenylate cyclase T25 domain, Kan <sup>R</sup>                 | This study |
| pAG25              | pUT18 containing c-terminus region of <i>pltB</i> fused to adenylate cyclase T18 domain, Amp <sup>R</sup>                  | This study |
| pAG26              | pUT18C containing c-terminus region of <i>pltB</i> fused to adenylate cyclase T18 domain, Amp <sup>R</sup>                 | This study |
| pAG27              | pKNT25 containing full-length <i>artB</i> fused to adenylate cyclase T25 domain, Kan <sup>R</sup>                          | This study |
| pAG28              | pUT18 containing full-length <i>artB</i> fused to adenylate cyclase T18 domain, Amp <sup>R</sup>                           | This study |
| pAG29              | pKT25 containing <i>artB</i> lacking signal peptide coding region fused to adenylate cyclase T25 domain, Kan <sup>R</sup>  | This study |
| pAG30              | pKNT25 containing <i>artB</i> lacking signal peptide coding region fused to adenylate cyclase T25 domain, Kan <sup>R</sup> | This study |
| pAG31              | pUT18 containing <i>artB</i> lacking signal peptide coding region fused to adenylate cyclase T18 domain, Amp <sup>R</sup>  | This study |
| pAG32              | pUT18C containing <i>artB</i> lacking signal peptide coding region fused to adenylate cyclase T18 domain, Amp <sup>R</sup> | This study |
| pAG33              | pKT25 containing c-terminus region of <i>artB</i> fused to adenylate cyclase T25 domain, Kan <sup>R</sup>                  | This study |

|       |                                                                                                            |            |
|-------|------------------------------------------------------------------------------------------------------------|------------|
| pAG34 | pKNT25 containing c-terminus region of <i>artB</i> fused to adenylate cyclase T25 domain, Kan <sup>R</sup> | This study |
| pAG35 | pUT18 containing c-terminus region of <i>artB</i> fused to adenylate cyclase T18 domain, Amp <sup>R</sup>  | This study |
| pAG36 | pUT18C containing c-terminus region of <i>artB</i> fused to adenylate cyclase T18 domain, Amp <sup>R</sup> | This study |
| pAG37 | pUT18 containing <i>pltB-3x-Flag artB-c-Myc</i>                                                            | This study |
| pAG38 | pUT18 containing <i>pltB-3x-Flag</i>                                                                       | This study |
| pAG39 | pUT18 containing <i>artB-c-Myc</i>                                                                         | This study |
| pAG40 | pKNT25 containing <i>cdtB-His pltA-Flag</i>                                                                | This study |
| pAG41 | pKNT25 containing <i>cdtB-His</i>                                                                          | This study |
| pAG42 | pKNT25 containing <i>pltA-Flag</i>                                                                         | This study |
| pAG43 | pKNT25 containing <i>cdtB-His pltA-Strep</i>                                                               | This study |
| pKD46 | $\lambda$ -Red recombinase plasmid                                                                         | (3)        |
| pKD4  | Template plasmid                                                                                           | (3)        |
| pCP20 | Flippase plasmid                                                                                           | (3)        |

---

## References

1. Karimova G, Pidoux J, Ullmann A, Ladant D. 1998. A bacterial two-hybrid system based on a reconstituted signal transduction pathway. *Proc Natl Acad Sci U S A* 95:5752-6.
2. Karimova G, Ullmann A, Ladant D. 2001. Protein-protein interaction between *Bacillus stearothermophilus* tyrosyl-tRNA synthetase subdomains revealed by a bacterial two-hybrid system. *J Mol Microbiol Biotechnol* 3:73-82.
3. Datsenko KA, Wanner BL. 2000. One-step inactivation of chromosomal genes in *Escherichia coli* K-12 using PCR products. *Proc Natl Acad Sci U S A* 97:6640-5.
