# Supplementary material for: The Majority of Typhoid Toxin-Positive Salmonella Serovars Encode ArtB, an Alternate Binding Subunit
Source: PubMed Central journal article supplement (PMC7845599; doi:10.1128/msphere.01255-20), 2021-01-06
Supplement: mSphere.01255-20-st007.pdf [file mSphere.01255-20-st007.pdf]

| Primer name          | Sequence (5' to 3')                        | Usage                                                      |
|----------------------|--------------------------------------------|------------------------------------------------------------|
| AG67-21-cdtB-BACTH-R | CTTAGGTACCCGACAGCTTCGTGCCAAAAAGGCT         | Clone full-length <i>cdtB</i> in BACTH vectors             |
| AG67-41-rbs-cdtB-F   | CGCTCTAGAATAGCGGGAGAGTAGATATCATGAA         | Clone full-length <i>cdtB</i> in BACTH vectors             |
| AG67-20-cdtB-BACTH-F | TCGACTCTAGAGAATATCAGTGACTACAAAGTTATG       | Clone <i>cdtB</i> without signal sequence in BACTH vectors |
| AG67-21-cdtB-BACTH-R | CTTAGGTACCCGACAGCTTCGTGCCAAAAAGGCT         | Clone <i>cdtB</i> without signal sequence in BACTH vectors |
| AG67-13-PltA-BACTH-R | CTTAGGTACCCGTTTAGAAAGTATAAGTTCTATTACA      | Clone full-length <i>pltA</i> in BACTH vectors             |
| AG67-37-rbs-pltA-F   | CGCTCTAGAATAGAGGAGGAAGAAATAATGAAAAAGTTAATA | Clone full-length <i>pltA</i> in BACTH vectors             |
| AG67-12-pltA-BACTH-F | TCGACTCTAGAGGTAGATTTTGTGTATCGTGTGGA        | Clone <i>pltA</i> without signal sequence in BACTH vectors |
| AG67-13-PltA-BACTH-R | CTTAGGTACCCGTTTAGAAAGTATAAGTTCTATTACA      | Clone <i>pltA</i> without signal sequence in BACTH vectors |
| AG67-39-rbs-artB-F   | CGCTCTAGAATAGAGGAGGTGGATTATGAAAAGAAATTAAG  | Clone <i>pltA</i> C-terminus region in BACTH vectors       |
| AG67-13-PltA-BACTH-R | CTTAGGTACCCGTTTAGAAAGTATAAGTTCTATTACA      | Clone <i>pltA</i> C-terminus region in BACTH vectors       |
| AG67-36-stop-pltB-F  | GCGTCTAGAATAATGTATATAAATAAGTTTGTGCCT       | Clone full-length <i>pltB</i> in BACTH vectors             |
| AG67-15-pltB-BACTH-R | CTTAGGTACCCGCTTGGGTCCAAAGCATTGTGT          | Clone full-length <i>pltB</i> in BACTH vectors             |
| AG67-14-PltB-BACTH-F | TCGACTCTAGAGGAGTGGACAGGAGATAAAACGA         | Clone <i>pltB</i> without signal sequence in BACTH vectors |
| AG67-15-pltB-BACTH-R | CTTAGGTACCCGCTTGGGTCCAAAGCATTGTGT          | Clone <i>pltB</i> without signal sequence in BACTH vectors |
| AG67-68-pltB-Ct-F    | TCGACTCTAGAGAGCATATGGGCACCCTCCT            | Clone <i>pltB</i> C-terminus region in BACTH vectors       |
| AG67-15-pltB-BACTH-R | CTTAGGTACCCGCTTGGGTCCAAAGCATTGTGT          | Clone <i>pltB</i> C-terminus region in BACTH vectors       |
| AG67-39-rbs-artB-F   | CGCTCTAGAATAGAGGAGGTGGATTATGAAAAGAAATTAAG  | Clone full-length <i>artB</i> in BACTH vectors             |

|                        |                                                                                      |                                                            |
|------------------------|--------------------------------------------------------------------------------------|------------------------------------------------------------|
| AG67-19-ArtB-BACTH-R   | CTTAGGTACCCGATTTGTCAACATAGGCCCCATA                                                   | Clone full-length <i>artB</i> in BACTH vectors             |
| AG67-18-ArtB-BACTH-F   | TCGACTCTAGAGGCTATGGCTGATTATGATACGTA                                                  | Clone <i>artB</i> without signal sequence in BACTH vectors |
| AG67-19-ArtB-BACTH-R   | CTTAGGTACCCGATTTGTCAACATAGGCCCCATA                                                   | Clone <i>artB</i> without signal sequence in BACTH vectors |
| AG67-67-ArtB-Ct-F      | TCGACTCTAGAGGGGAATCATAAACAGGGGTTTG                                                   | Clone <i>artB</i> C-terminus region in BACTH vectors       |
| AG67-19-ArtB-BACTH-R   | CTTAGGTACCCGATTTGTCAACATAGGCCCCATA                                                   | Clone <i>artB</i> C-terminus region in BACTH vectors       |
| AG67-35-rbs-pltB-F     | CGCTCTAGAATAGATTTTAAATGTACAGGAGAGTA<br>ATCTTTATAATCACCATCATGATCTTTATAATCTGGACGCTTGGG | Construction of <i>pltB-3x-Flag</i>                        |
| AG67-48-pltB-3xFLAG-R1 | TCCAAAGCATTGTG                                                                       | Construction of <i>pltB-3x-Flag</i>                        |
| AG67-49-pltB-3xFLAG-R2 | ATCATCATCTTTATAATCAATATCATGATCTTTATAATCACCATCATGATCT                                 | Construction of <i>pltB-3x-Flag</i>                        |
| AG67-50-pltB-3xFLAG-R3 | CGCGGTACCTTATTTATCATCATCATCTTTATAATCAATATCATGATCTT                                   | Construction of <i>pltB-3x-Flag</i>                        |
| AG67-51-artB-cmyc-F    | CGCGGTACCATAGAGGAGGTGGATTATGAAAAAGAAATTAAG                                           | Construction of <i>artB-c-Myc</i>                          |
| AG67-52-artB-cmyc-R1   | TAATCAGTTTCTGTTCTGGACGATTTGTCAACATAGGCCCCAT                                          | Construction of <i>artB-c-Myc</i>                          |
| AG67-53-artB-cmyc-R2   | CGCGAATTCTTACAGATCTTCTTCGCTAATCAGTTTCTGTTCTGGACGA                                    | Construction of <i>artB-c-Myc</i>                          |
| AG67-41-rbs-cdtB-F     | CGCTCTAGAATAGCGGGAGAGTAGATATCATGAA                                                   | Construction of <i>cdtB-His</i>                            |
| AG67-54-cdtB-His-R1    | GATGATGATGATGATGTGGACGACAGCTTCGTGCCAAAAAGG                                           | Construction of <i>cdtB-His</i>                            |
| AG67-55-cdtB-His-R2    | TATGGTACCTTAATGATGATGATGATGATGATGATGATGATGTGGAC                                      | Construction of <i>cdtB-His</i>                            |
| AG67-56-pltA-FLAG-F    | CGCGGTACCATAGAGGAGGAAGAAATAATGAAAAAGTTAATA                                           | Construction of <i>pltA-Flag</i>                           |
| AG67-57-pltA-FLAG-R1   | TCTTTATAATCTGGACGTTTAGAAAGTATAAGTTCTATTACA                                           | Construction of <i>pltA-Flag</i>                           |
| AG67-58-pltA-FLAG-R2   | CGCGAGCTCTTATTTATCATCATCATCTTTATAATCTGGACGTTTAGA                                     | Construction of <i>pltA-Flag</i>                           |
| AG67-56-pltA-FLAG-F    | CGCGGTACCATAGAGGAGGAAGAAATAATGAAAAAGTTAATA                                           | Construction of <i>pltA-Strep</i>                          |
| AG67-87-pltA-Strep-R1  | CGAACTGCGGGTGGCTCCAAGAACCCTTTAGAAAGTATAAGTTCTATTACA                                  | Construction of <i>pltA-Strep</i>                          |
| AG67-88-pltA-Strep-R2  | CGCGAGCTCTTATTTTTCGAACTGCGGGTGGCTCCA                                                 | Construction of <i>pltA-Strep</i>                          |
| SH144-cyaA-pKD4-F      | TATTGAGACTCTGAAACAGAGACTGGATGTGTAGGCTGGAGCTGCTTC                                     | <i>cyaA</i> in-frame deletion                              |
| SH145-cyaA-pKD4-R      | ATACTGCTGCAATAGCGGCGCGTCATGATCCATATGAATATCCTCCTTAG                                   | <i>cyaA</i> in-frame deletion                              |
| SH126-dcyaA-F          | TTTAAGAATTTACACGCAGCGAACGGTGCTAC                                                     | Sequence <i>cyaA</i> mutant                                |
| SH127-dcyaA-R          | ACGCATCTGCCACCTCAAACCTCCTCCTGTA                                                      | Sequence <i>cyaA</i> mutant                                |
| RM79_cdtB_RTPCR_F      | ACCTGGAATCTCGGAACCAC                                                                 | qPCR detection of <i>cdtB</i>                              |
| RM80_cdtB_RTPCR_R      | GGCGAGATGCGACAGTTGTC                                                                 | qPCR detection of <i>cdtB</i>                              |
| RM83_pltB_RTPCR_F      | GGTGTACCGCTACCGTTAGC                                                                 | qPCR detection of <i>pltB</i>                              |
| RM84_pltB_RTPCR_R      | TTAATGCCAGCGCTGAGTGG                                                                 | qPCR detection of <i>pltB</i>                              |
| RM85_rpoB_RTPCR_F      | TACGGGACGCATCCACGTAC                                                                 | qPCR detection of <i>rpoB</i>                              |

|                   |                             |                               |
|-------------------|-----------------------------|-------------------------------|
| RM86_rpoB_RTPCR_R | GTGCGAACATGCAACGTCAG        | qPCR detection of <i>rpoB</i> |
| RM298_artBqPCR_F  | GAGTGAGGCTATTAGTGTCAATGCCAT | qPCR detection of <i>artB</i> |
| RM299_artBqPCR_R  | TCCCTGGAAGAGAATGCACTTTTGA   | qPCR detection of <i>artB</i> |

---
